# Supplementary material for: How Do Gyrating Beads Accelerate Amyloid Fibrillization?
Source: PubMed Central journal article supplement — Biophys J. 2017 Jan 24;112(2):250–64. doi: 10.1016/j.bpj.2016.12.004 (PMC5266089; doi:10.1016/j.bpj.2016.12.004), 2017-01-24
Supplement: mmc1.pdf [file mmc1.pdf]

**Biophysical Journal, Volume 112**

**Supplemental Information**

**How Do Gyrating Beads Accelerate Amyloid Fibrillization?**

**Alireza Abdolvahabi, Yunhua Shi, Sanaz Rasouli, Corbin M. Croom, Aleksandra Chuprin, and Bryan F. Shaw**

How do gyrating beads accelerate amyloid fibrillization?

A.A., Y.S., S.R., C.M.C., A.C., B.F.S.

\*\*\*Supporting Material\*\*\*

## Supporting Figures:

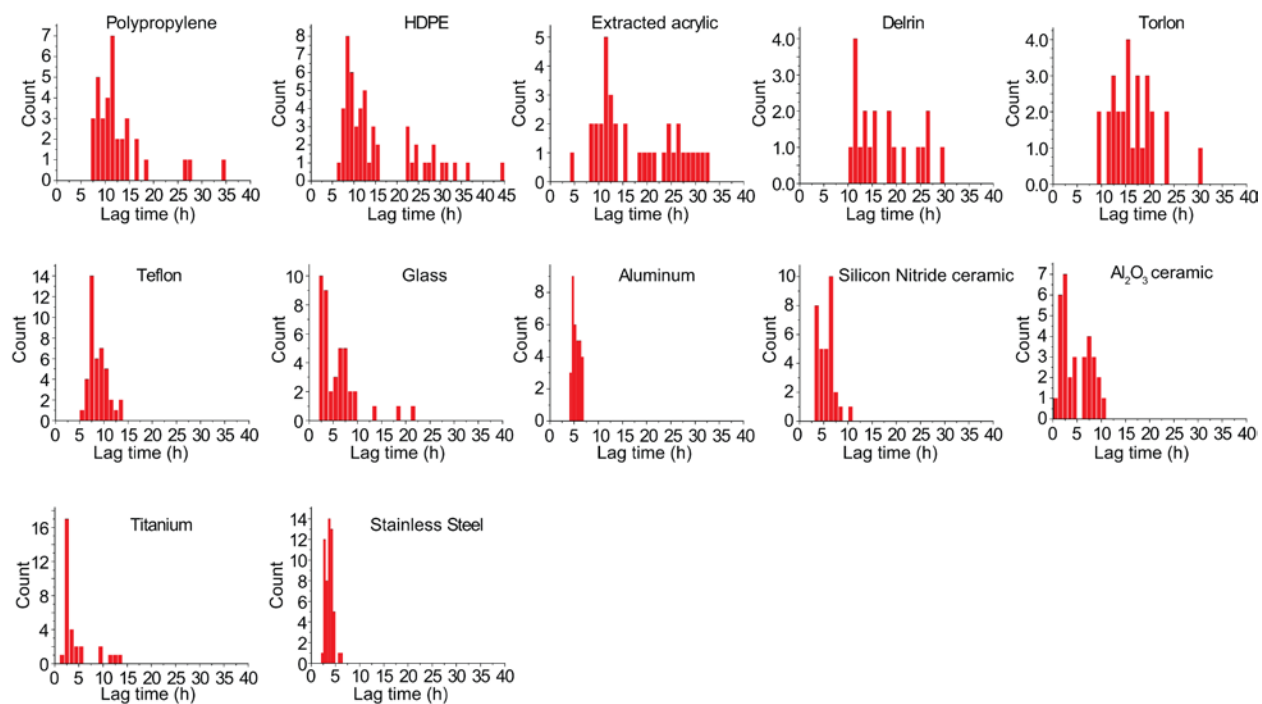

**FIGURE S1.** Histograms of lag time of D90A apo-SOD1 aggregation in the presence of different bead types.

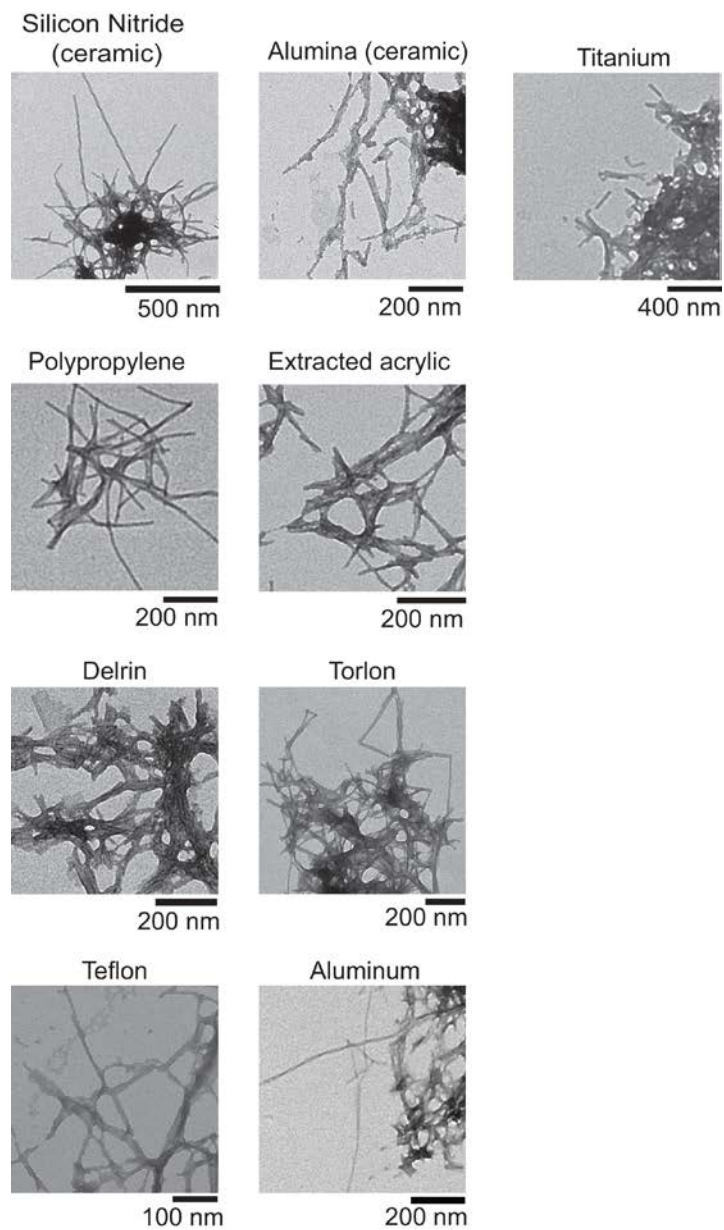

**FIGURE S2.** Transmission electron micrographs of D90A apo-SOD1 aggregates in the presence of different beads. TEM micrographs of apo-SOD1 fibrils in the presence of HDPE, glass, and steel beads are shown in the Fig. 8A of the main text.

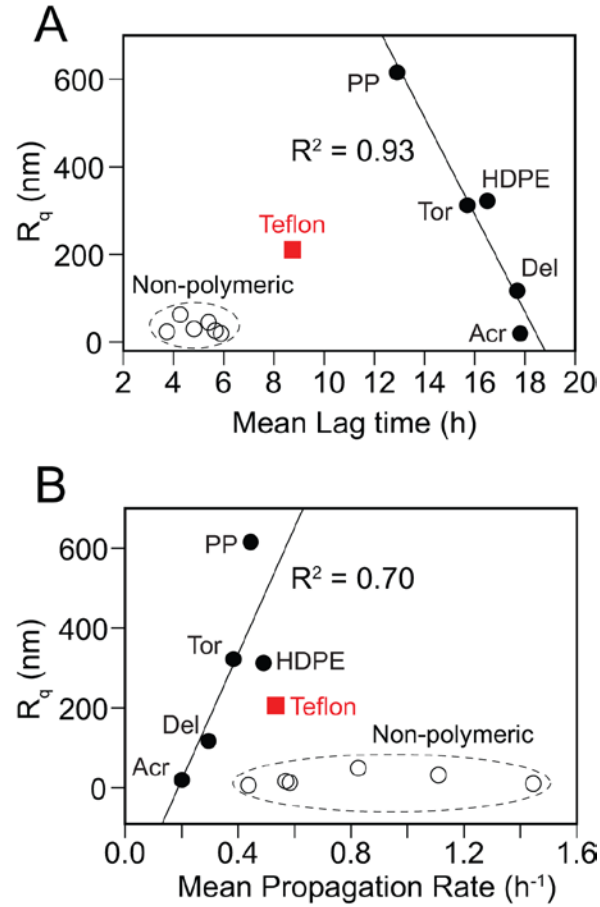

**FIGURE S3.** Correlation plots of bead surface roughness vs. **(A)** lag time, and **(B)** propagation rate of apo-SOD1 aggregation. Teflon was an outlier in this correlation and was excluded from fits in both plots.

**Table S1.** Physicomechanical properties of all studied beads in this paper. Values for  $E^*$ ,  $r$ ,  $r'$ ,  $p_g$ , and  $p_{cent}$  are calculated according to formalism described in the main text (Equations 2-6).

| Bead                      | $E_1$ (GPa) | $\nu_1$ | $E^*$ (GPa) <sup>a</sup> | $r$ ( $\mu\text{m}$ ) | $r'$ ( $\mu\text{m}$ ) | $p_g$ (kPa) | $p_{cent}$ (kPa) |
|---------------------------|-------------|---------|--------------------------|-----------------------|------------------------|-------------|------------------|
| Polypropylene             | 1.2         | 0.45    | 1.07                     | 69.5                  | 137.2                  | —           | 29.9             |
| HDPE                      | 0.8         | 0.43    | 0.77                     | 77.6                  | 153.1                  | —           | 24.1             |
| Extracted acrylic         | 2.5         | 0.40    | 1.65                     | 66.2                  | 130.6                  | 3.6         | 43.9             |
| Polyoxymethylene (Delrin) | 2.8         | 0.35    | 1.71                     | 67.4                  | 133.0                  | 6.9         | 46.4             |
| Polyamide-imide (Torlon)  | 6.6         | 0.41    | 2.53                     | 59.9                  | 118.2                  | 9.4         | 60.7             |
| PTFE (Teflon)             | 0.5         | 0.46    | 0.54                     | 115.2                 | 227.3                  | 6.9         | 25.1             |
| Borosilicate glass        | 70          | 0.22    | 3.53                     | 64.3                  | 126.9                  | 25.3        | 91.1             |
| Aluminum                  | 69          | 0.33    | 3.54                     | 67.4                  | 132.9                  | 30.6        | 95.6             |
| Silicon nitride (ceramic) | 310         | 0.27    | 3.66                     | 69.8                  | 137.7                  | 36.4        | 102.7            |
| Alumina (ceramic)         | 300         | 0.21    | 3.66                     | 74.1                  | 146.2                  | 40.9        | 108.9            |
| Titanium                  | 112.5       | 0.32    | 3.59                     | 77.6                  | 153.1                  | 43.9        | 112.0            |
| Stainless steel           | 200         | 0.31    | 3.64                     | 94.1                  | 185.7                  | 60.4        | 137.6            |

<sup>a</sup>Values for  $E^*$  are calculated from Equation (4) of the main text with  $E_2 = 3.2$  GPa and  $\nu_2 = 0.34$  for black polystyrene.
